# Supplementary material for: Emollient use alters skin barrier and microbes in infants at risk for developing atopic dermatitis
Source: PubMed Central journal article supplement (PMC5830298; doi:10.1371/journal.pone.0192443), 2018-02-28

S3 Fig

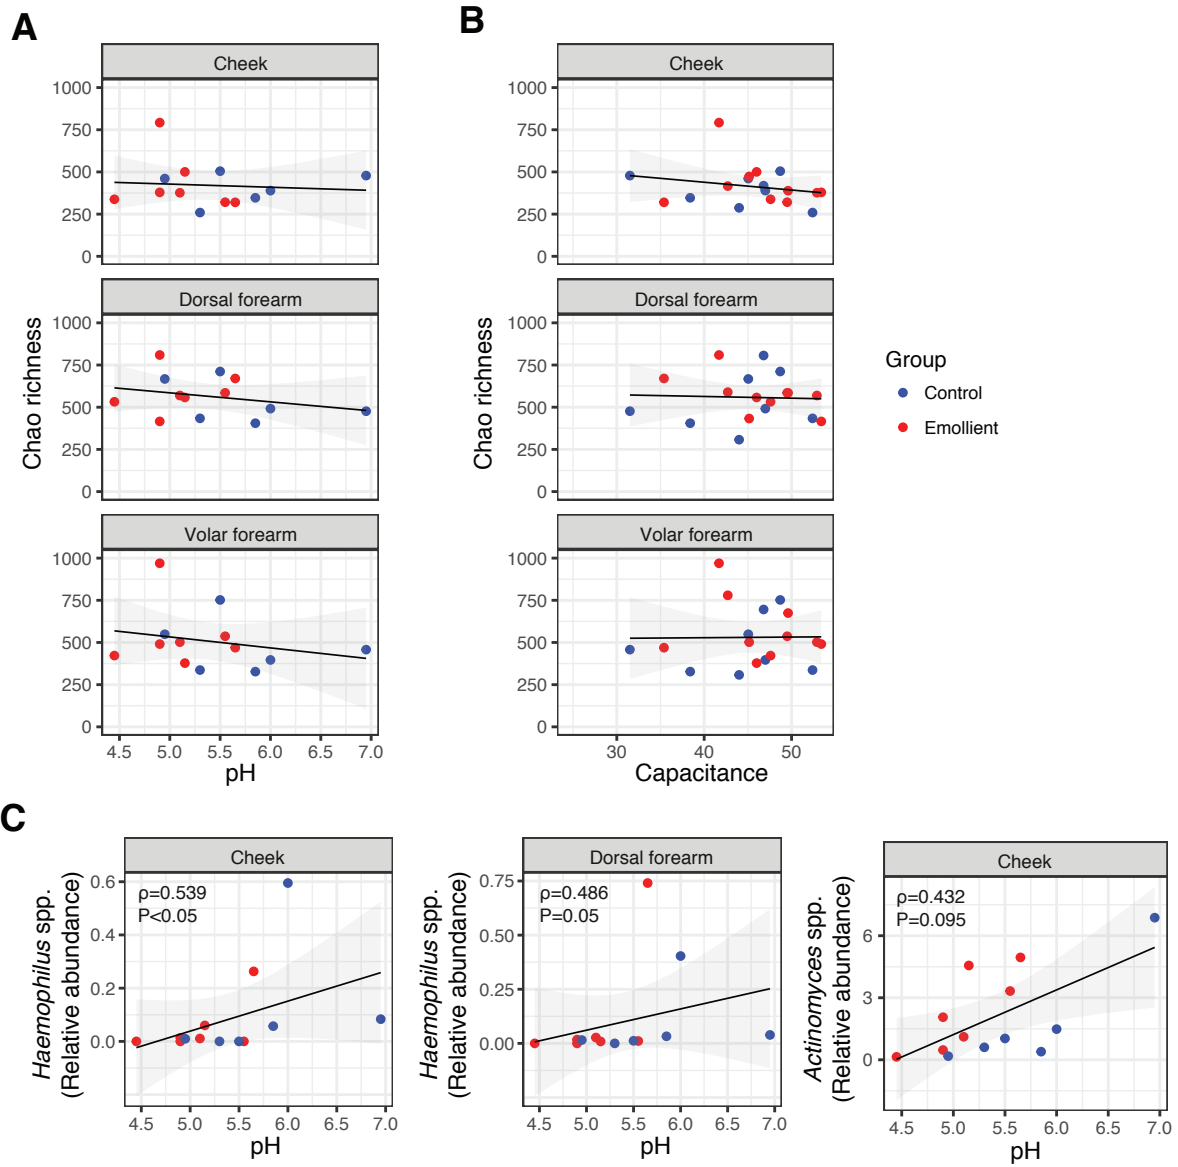

Supplement: pone.0192443.s003.pdf [file pone.0192443.s003.pdf]
