# Supplementary material for: Emollient use alters skin barrier and microbes in infants at risk for developing atopic dermatitis
Source: PubMed Central journal article supplement (PMC5830298; doi:10.1371/journal.pone.0192443), 2018-02-28
Supplement: pone.0192443.s007.pdf [file pone.0192443.s007.pdf]

S1 Table

| <b>Sampling site</b>  | <b>Taxon removed from AMOVA<sup>a</sup></b> | <b>P-value AMOVA</b> |
|-----------------------|---------------------------------------------|----------------------|
| <b>Cheek</b>          | None                                        | <0.001               |
|                       | <i>Streptococcus salivarius</i> (a)         | 0.14                 |
|                       | <i>Streptococcus mitis</i> group (b)        | 0.09                 |
|                       | <i>Rothia</i> (c)                           | <0.001               |
|                       | <i>Veillonella</i> (d)                      | <0.001               |
|                       | <i>Actinomyces</i> (e)                      | <0.001               |
|                       | <i>Gemella</i> (f)                          | <0.001               |
|                       | <i>Corynebacterium</i> (g)                  | <0.001               |
|                       | <i>Propionibacterium</i> (h)                | 0.001                |
| <b>Dorsal forearm</b> | None                                        | 0.16                 |
|                       | <i>Propionibacterium</i> (a)                | 0.08                 |
|                       | <i>Streptococcus mitis</i> group (b)        | 0.36                 |
|                       | <i>Staphylococcus</i> (c)                   | 0.17                 |
|                       | <i>Granulicatella</i> (d)                   | 0.16                 |
|                       | <i>Rothia</i> (e)                           | 0.17                 |
|                       | <i>Corynebacterium</i> (f)                  | 0.13                 |
|                       | <i>Streptococcus salivarius</i> (g)         | 0.47                 |
|                       | <i>Prevotella</i> (h)                       | 0.14                 |
| <b>Volar forearm</b>  | None                                        | 0.16                 |
|                       | <i>Streptococcus mitis</i> group (a)        | 0.36                 |
|                       | <i>Gemella</i> (b)                          | 0.16                 |
|                       | <i>Actinomyces</i> (c)                      | 0.17                 |
|                       | <i>Rothia</i> (d)                           | 0.16                 |
|                       | <i>Porphyromonas</i> (e)                    | 0.15                 |
|                       | <i>Prevotella</i> (f)                       | 0.14                 |
|                       | <i>Veillonella</i> (g)                      | 0.18                 |
|                       | <i>Streptococcus salivarius</i> (h)         | 0.33                 |

<sup>a</sup>Letters in parentheses indicate labels for taxa in figure 2

AMOVA, analysis of molecular variance.
